# Supplementary material for: Two novel loci underlie natural differences in Caenorhabditis elegans abamectin responses
Source: PubMed Central journal article supplement (PMC7993787; doi:10.1371/journal.ppat.1009297), 2021-03-15

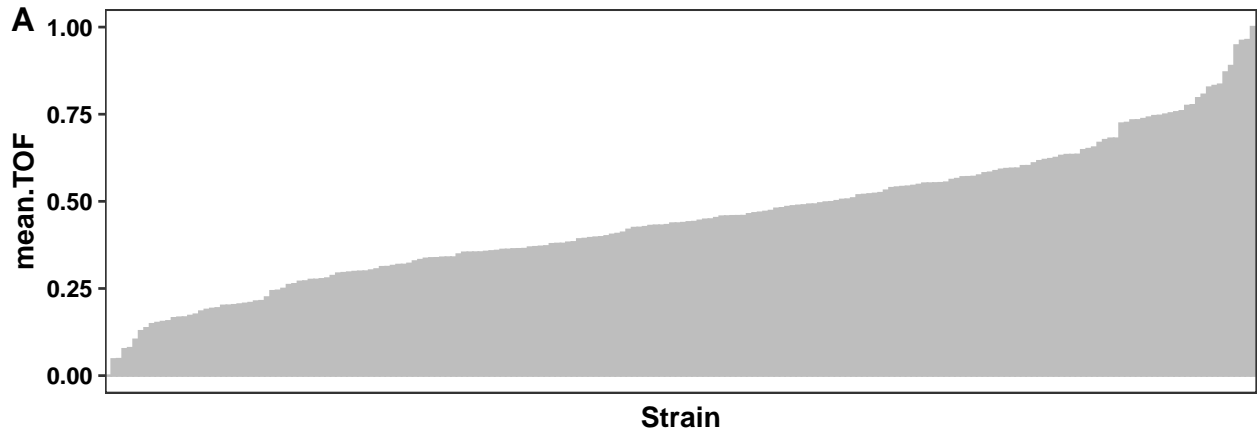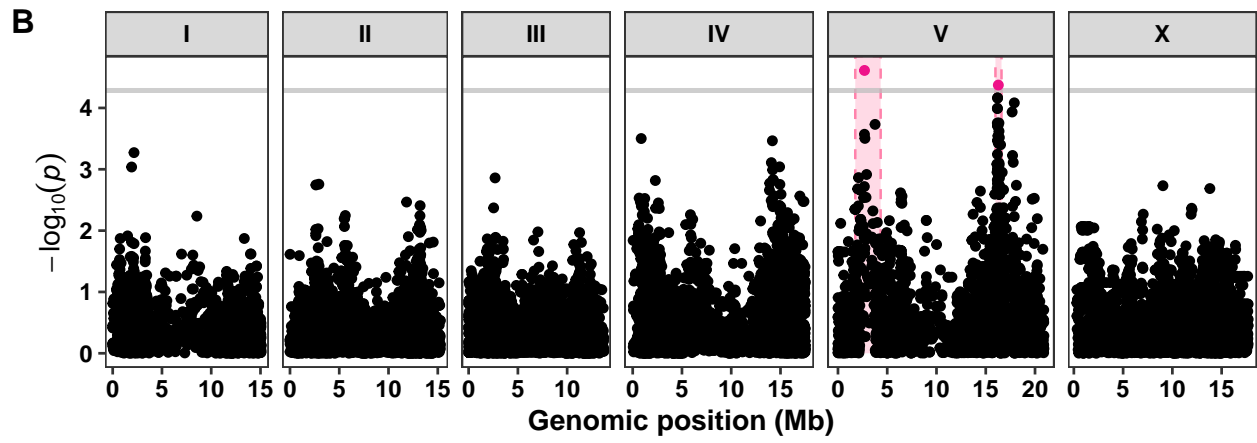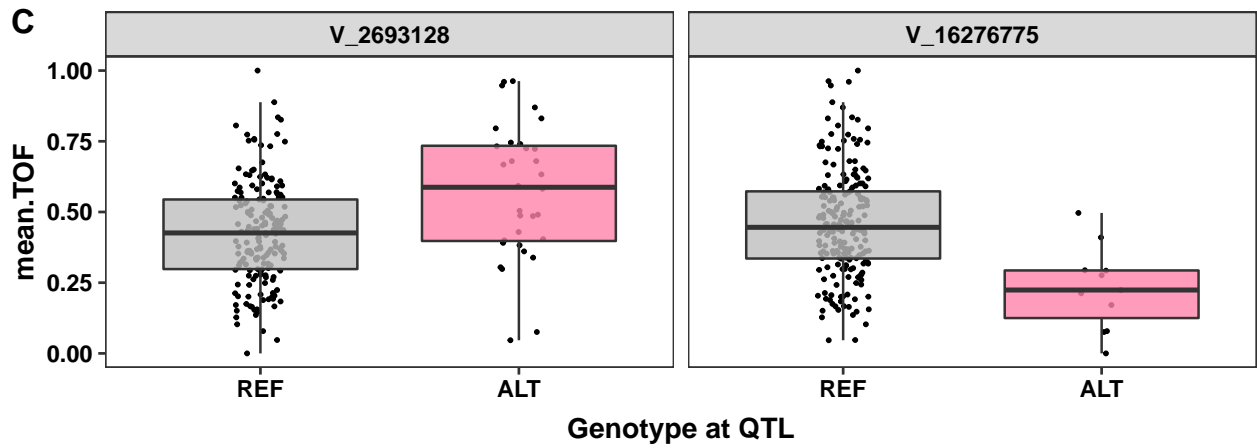

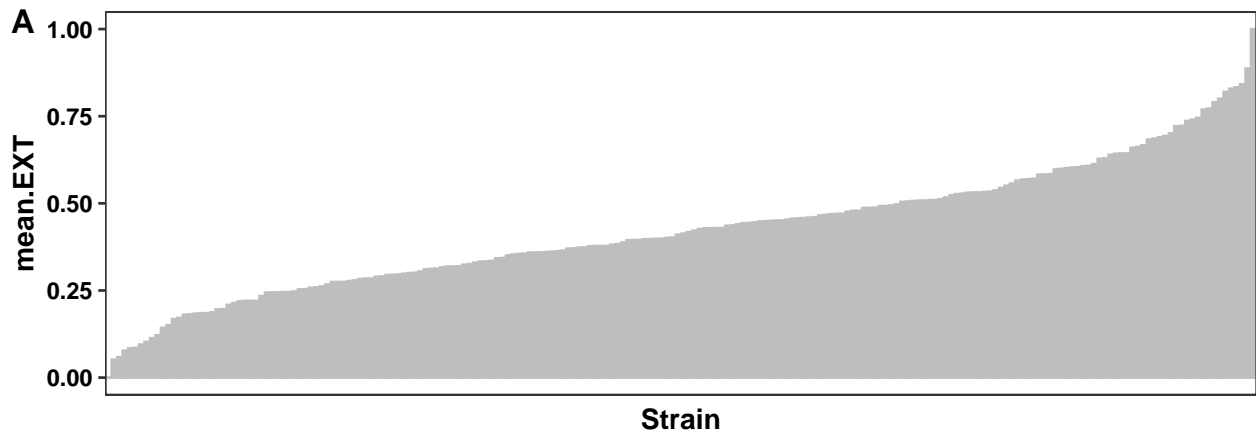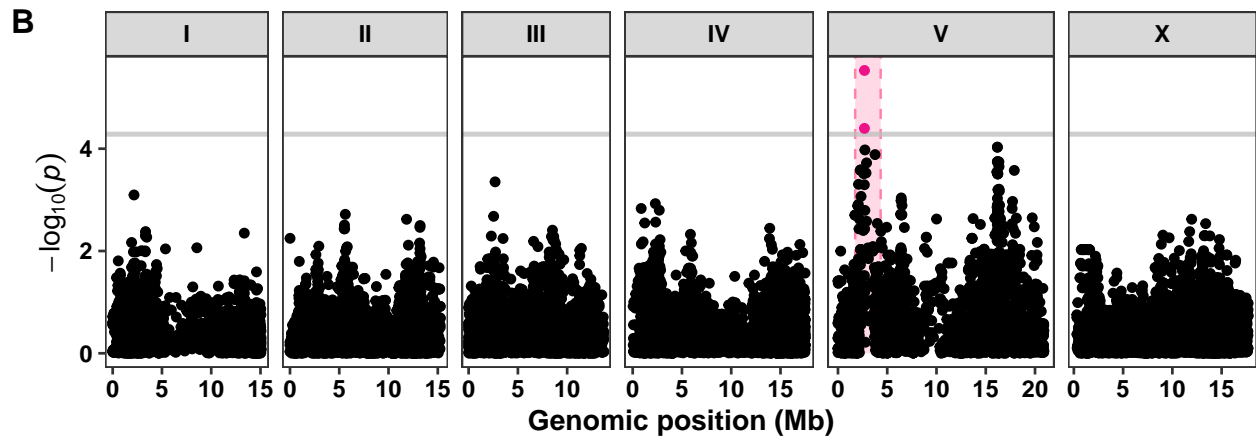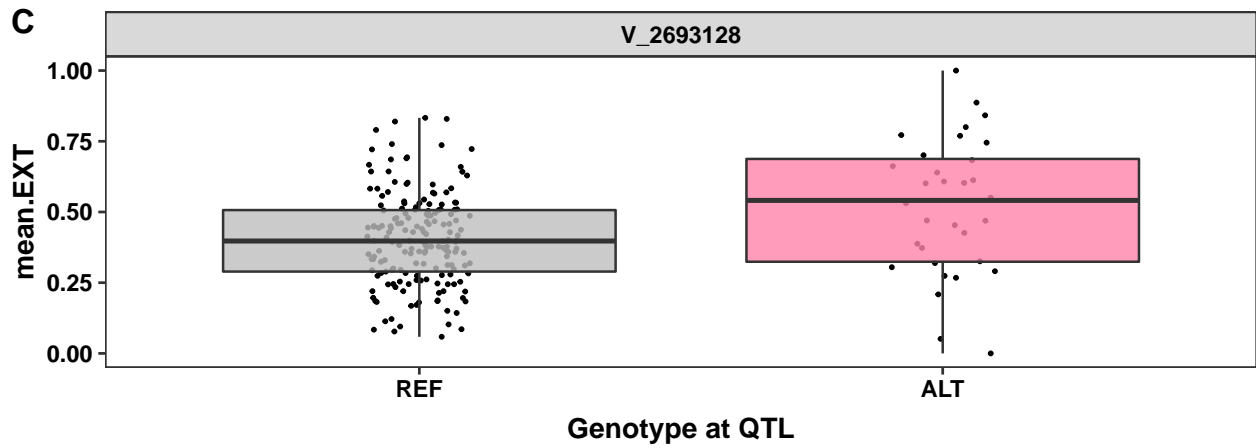

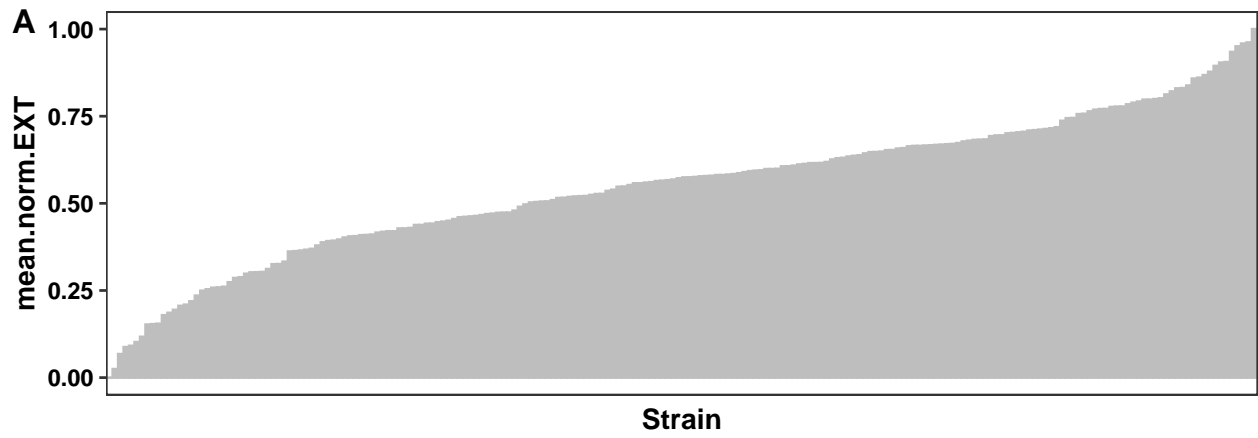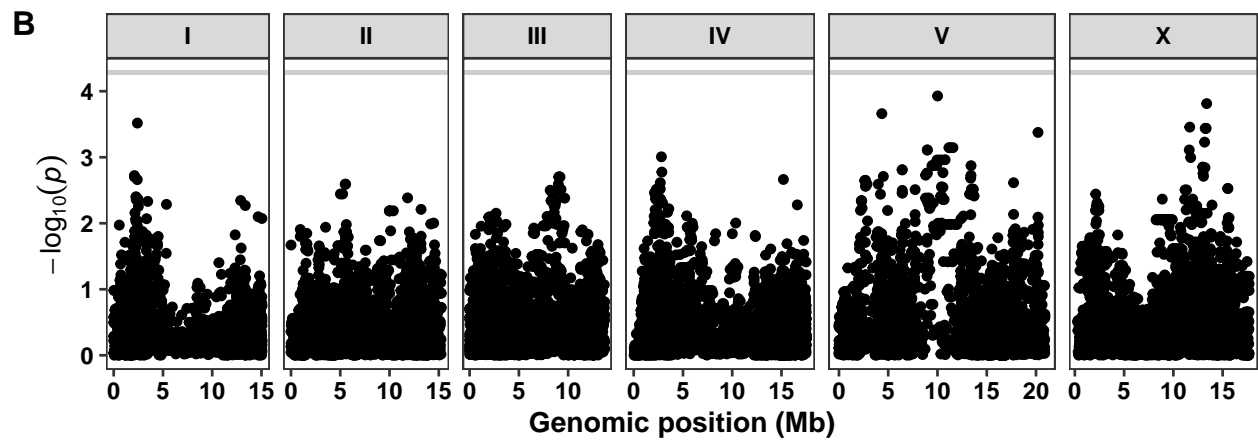

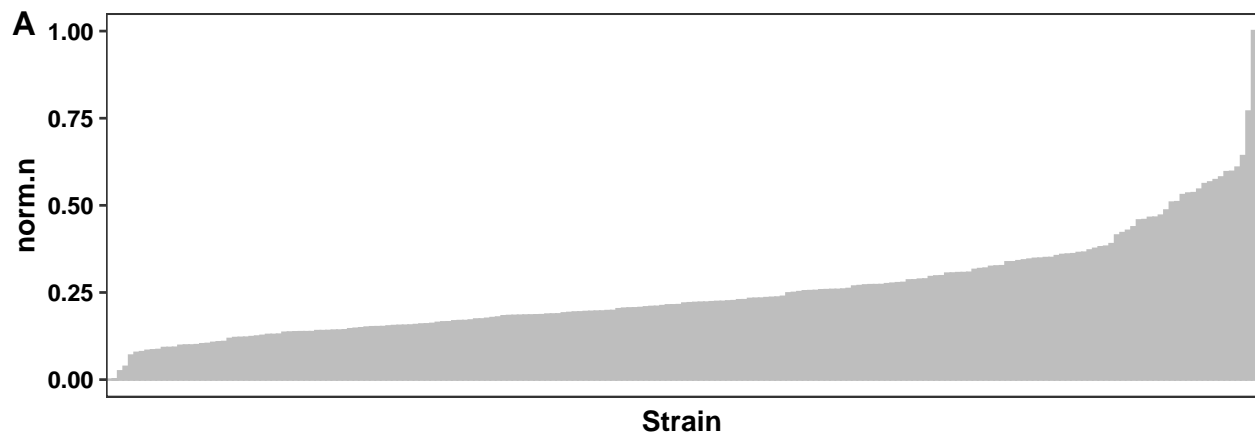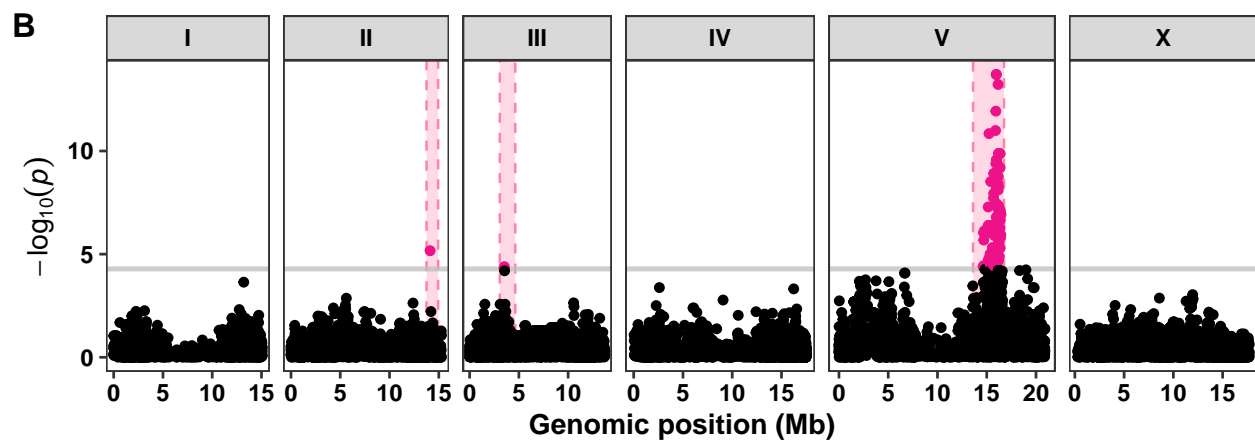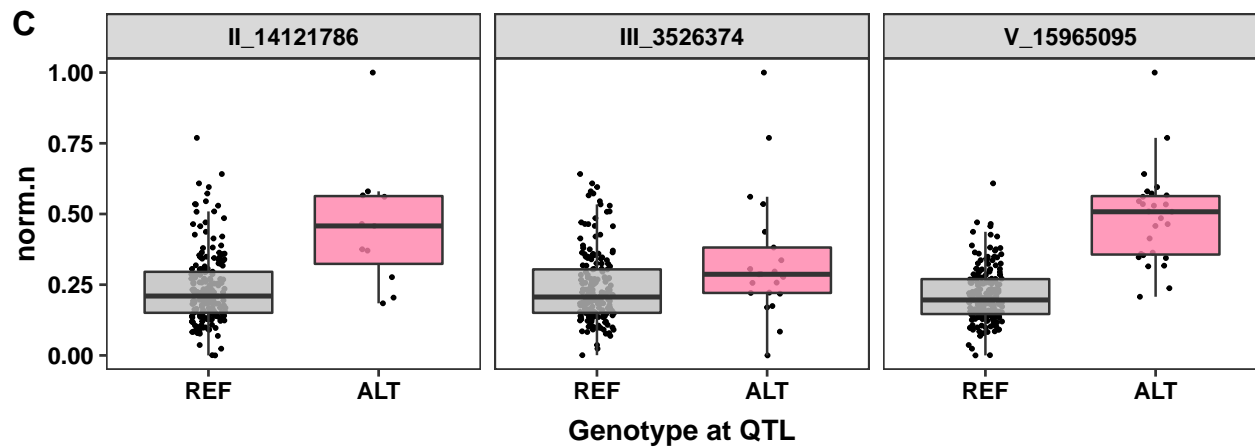

Supplement: ppat.1009297.s002.pdf [file ppat.1009297.s002.pdf]
