# Supplementary material for: Two novel loci underlie natural differences in Caenorhabditis elegans abamectin responses
Source: PLoS Pathog. 2021 Mar 15;17(3):e1009297. doi: 10.1371/journal.ppat.1009297 (PMC7993787; doi:10.1371/journal.ppat.1009297)
Supplement: S9 File — Simplified genotypes of the NILs in the study. (CSV) [file ppat.1009297.s020.csv]

	chrom	start	end	sample	gt	gt_name	supporting_sites	sites	DP	switches
1	I	1	15072434	ECA629	1	N2	8520	8544	1.37183098592	46
2	II	1	15279421	ECA629	1	N2	14463	14506	1.42204245316	80
3	III	1	13783801	ECA629	1	N2	7825	7848	1.35884984026	42
4	IV	1	17493829	ECA629	1	N2	9045	9064	1.38164731896	38
5	V	1	5264018	ECA629	1	N2	8100	8131	1.42135802469	59
6	V	5264019	7948059	ECA629	2	CB4856	3727	3997	1.46954655219	417
7	V	7948060	20924180	ECA629	1	N2	17189	17217	1.42724998546	52
8	X	1	17718942	ECA629	1	N2	8529	8548	1.44624223238	38
9	MtDNA	1	13794	ECA629	1	N2	38	38	8.13157894737	0
10	I	1	15072434	ECA634	1	N2	13017	13049	1.68548820773	64
11	II	1	15279421	ECA634	1	N2	22598	22649	1.77082042659	94
12	III	1	13783801	ECA634	1	N2	11553	11590	1.65498139012	62
13	IV	1	17493829	ECA634	1	N2	14113	14143	1.72911500035	56
14	V	1	5261629	ECA634	1	N2	12893	12924	1.83494919724	60
15	V	5261630	6966106	ECA634	2	CB4856	1530	1602	1.80196078431	128
16	V	6966107	20924180	ECA634	1	N2	29570	29620	1.8554616165	96
17	X	1	17718942	ECA634	1	N2	12263	12285	1.88926037674	44
18	MtDNA	1	13794	ECA634	1	N2	38	38	1.76315789474	0
19	I	1	15072434	ECA632	1	N2	10342	10379	1.51556758847	68
20	II	1	15279421	ECA632	1	N2	17513	17555	1.54588020328	78
21	III	1	13783801	ECA632	1	N2	9252	9279	1.45373973195	50
22	IV	1	17493829	ECA632	1	N2	11262	11310	1.52592789913	72
23	V	1	5260996	ECA632	1	N2	9957	9985	1.49984935221	56
24	V	5260997	5906132	ECA632	2	CB4856	463	493	1.42332613391	52
25	V	5906133	20924180	ECA632	1	N2	25082	25153	1.59763974165	134
26	X	1	17718942	ECA632	1	N2	10052	10071	1.58734580183	36
27	MtDNA	1	13794	ECA632	1	N2	38	38	1.42105263158	0
28	I	1	15072434	ECA636	1	N2	12144	12177	1.58333333333	66
29	II	1	15279421	ECA636	1	N2	20783	20836	1.63720348362	104
30	III	1	13783801	ECA636	1	N2	11086	11110	1.55024355042	44
31	IV	1	17493829	ECA636	1	N2	13383	13422	1.61204513188	66
32	V	1	5261490	ECA636	1	N2	11633	11654	1.66569242672	40
33	V	5261491	6488298	ECA636	2	CB4856	1134	1185	1.62698412698	92
34	V	6488299	20924180	ECA636	1	N2	28216	28256	1.70406861355	80
35	X	1	17718942	ECA636	1	N2	11530	11546	1.7445793582	30
36	MtDNA	1	13794	ECA636	1	N2	38	38	1.78947368421	0
37	I	1	15072434	ECA573	1	N2	9004	9065	1.41914704576	94
38	II	1	15279421	ECA573	1	N2	15792	15889	1.48290273556	146
39	III	1	13783801	ECA573	1	N2	7883	7932	1.38196118229	68
40	IV	1	17493829	ECA573	1	N2	9728	9766	1.470703125	66
41	V	1	2719873	ECA573	2	CB4856	3486	3800	1.48250143431	498
42	V	2719874	2721811	ECA573	1	N2	18	18	1.66666666667	0
43	V	2721812	20923490	ECA573	2	CB4856	22592	24696	1.48154213881	2989
44	X	1	17718942	ECA573	1	N2	8688	8728	1.52681860037	72
45	MtDNA	1	13794	ECA573	1	N2	38	38	1.39473684211	0
46	I	1	2197773	ECA554	2	CB4856	1587	1754	1.36420919975	246
47	I	2197774	2769592	ECA554	1	N2	672	674	1.32886904762	4
48	I	2769593	15072434	ECA554	2	CB4856	6534	6970	1.51423324151	728
49	II	1	1831900	ECA554	2	CB4856	2905	3118	1.54629948365	301
50	II	1831901	1834285	ECA554	1	N2	16	16	1	0
51	II	1834286	15279421	ECA554	2	CB4856	11520	12338	1.54045138889	1268
52	III	1	943631	ECA554	2	CB4856	1629	1743	1.55555555556	178
53	III	943632	960446	ECA554	1	N2	27	32	1.33333333333	4
54	III	960447	13783801	ECA554	2	CB4856	6153	6660	1.47001462701	807
55	IV	1	17493829	ECA554	2	CB4856	9462	10128	1.45466074826	1096
56	V	1	20924180	ECA554	1	N2	34111	34201	1.55319398435	164
57	X	1	12360	ECA554	1	N2	1	1	1	0
58	X	12361	17718942	ECA554	2	CB4856	8462	9015	1.51796265658	990
59	MtDNA	1	13794	ECA554	2	CB4856	38	38	1.47368421053	0
60	I	1	15072434	ECA232	1	N2	2898	2991	1.47481021394	152
61	II	1	2251085	ECA232	1	N2	1115	1208	1.4600896861	68
62	II	2251086	2258255	ECA232	2	CB4856	21	23	1.04761904762	4
63	II	2258256	15279421	ECA232	1	N2	2832	3020	1.36228813559	246
64	III	1	13783801	ECA232	1	N2	2411	2550	1.48029863127	174
65	IV	1	6275928	ECA232	1	N2	1120	1174	1.52410714286	84
66	IV	6275929	6276271	ECA232	2	CB4856	15	15	1.26666666667	0
67	IV	6276272	7453961	ECA232	1	N2	142	154	1.43661971831	18
68	IV	7453962	7459213	ECA232	2	CB4856	12	12	1.33333333333	0
69	IV	7459214	17493829	ECA232	1	N2	1293	1357	1.19644238206	86
70	V	1	7374927	ECA232	1	N2	2985	3105	1.5149078727	146
71	V	7374928	7661339	ECA232	2	CB4856	316	372	1.20253164557	38
72	V	7661340	7667157	ECA232	1	N2	24	24	3.41666666667	0
73	V	7667158	13678801	ECA232	2	CB4856	437	507	1.53546910755	112
74	V	13678802	16175197	ECA232	1	N2	993	1005	1.12789526687	18
75	V	16175198	16176755	ECA232	2	CB4856	32	32	1.21875	0
76	V	16176756	16179536	ECA232	1	N2	15	15	35.2666666667	0
77	V	16179537	16179967	ECA232	2	CB4856	14	15	1	2
78	V	16179968	16181996	ECA232	1	N2	26	26	1.46153846154	0
79	V	16181997	16184402	ECA232	2	CB4856	14	14	1	0
80	V	16184403	20924180	ECA232	1	N2	3442	3571	1.47646717025	124
81	X	1	17718942	ECA232	1	N2	1949	2066	1.30938943048	184
82	MtDNA	1	13794	ECA232	1	N2	36	37	1.13888888889	2
83	I	1	15072434	ECA377	1	N2	3054	3125	1.43975114604	104
84	II	1	15279421	ECA377	1	N2	5088	5238	1.45224056604	210
85	III	1	13783801	ECA377	1	N2	2966	3063	1.5060687795	132
86	IV	1	6278236	ECA377	1	N2	1264	1330	1.50791139241	102
87	IV	6278237	6279372	ECA377	2	CB4856	12	12	1.25	0
88	IV	6279373	6299498	ECA377	1	N2	103	103	1.17475728155	0
89	IV	6299499	6300308	ECA377	2	CB4856	17	17	1	0
90	IV	6300309	17493829	ECA377	1	N2	1383	1473	1.3579175705	134
91	V	1	709598	ECA377	1	N2	646	661	1.39009287926	10
92	V	709599	710971	ECA377	2	CB4856	15	16	1.66666666667	2
93	V	710972	3120167	ECA377	1	N2	1161	1218	1.46339362618	74
94	V	3120168	3774538	ECA377	2	CB4856	322	367	1.58385093168	52
95	V	3774539	3778794	ECA377	1	N2	13	13	1.07692307692	0
96	V	3778795	3905391	ECA377	2	CB4856	93	98	1.29032258065	8
97	V	3905392	3909043	ECA377	1	N2	23	23	2.04347826087	0
98	V	3909044	6415575	ECA377	2	CB4856	491	573	1.46639511202	106
99	V	6415576	6430888	ECA377	1	N2	15	18	1	2
100	V	6430889	7331112	ECA377	2	CB4856	129	148	1.13178294574	28
101	V	7331113	7338519	ECA377	1	N2	31	31	1.16129032258	0
102	V	7338520	7354992	ECA377	2	CB4856	127	129	1.2125984252	4
103	V	7354993	7358819	ECA377	1	N2	12	12	1	0
104	V	7358820	7608569	ECA377	2	CB4856	108	115	1.03703703704	10
105	V	7608570	7611377	ECA377	1	N2	18	18	1.38888888889	0
106	V	7611378	7641258	ECA377	2	CB4856	115	128	1.26086956522	12
107	V	7641259	7642059	ECA377	1	N2	19	19	1	0
108	V	7642060	8968088	ECA377	2	CB4856	159	171	2.45283018868	20
109	V	8968089	17811940	ECA377	1	N2	3125	3217	1.2928	112
110	V	17811941	17814667	ECA377	2	CB4856	14	14	1.78571428571	0
111	V	17814668	20924180	ECA377	1	N2	2215	2292	1.61715575621	84
112	X	1	17718942	ECA377	1	N2	2160	2267	1.21990740741	168
113	MtDNA	1	13794	ECA377	1	N2	38	38	1.15789473684	0
114	I	1	15072434	N2	1	N2	21342	21342	95.1838159498	0
115	II	1	15279421	N2	1	N2	32910	32910	111.991096931	0
116	III	1	13783801	N2	1	N2	20103	20103	92.5672287718	0
117	IV	1	17493829	N2	1	N2	22520	22520	90.8837921847	0
118	V	1	20924180	N2	1	N2	61705	61705	113.016044081	0
119	X	1	17718942	N2	1	N2	17395	17395	110.484679506	0
120	MtDNA	1	13794	N2	1	N2	36	36	1981.33333333	0
121	I	1	15072434	CB4856	2	CB4856	21342	21342	68.2735451223	0
122	II	1	15279421	CB4856	2	CB4856	32910	32910	76.2178669098	0
123	III	1	13783801	CB4856	2	CB4856	20103	20103	65.2343431329	0
124	IV	1	17493829	CB4856	2	CB4856	22520	22520	64.9701598579	0
125	V	1	20924180	CB4856	2	CB4856	61705	61705	74.6836561057	0
126	X	1	17718942	CB4856	2	CB4856	17395	17395	80.5093992527	0
127	MtDNA	1	13794	CB4856	2	CB4856	36	36	1302.13888889	0
128	I	1	15072434	N2	1	N2	21342	21342	95.1838159497704	0
129	II	1	15279421	N2	1	N2	32910	32910	111.991096931024	0
130	III	1	13783801	N2	1	N2	20103	20103	92.5672287718251	0
131	IV	1	17493829	N2	1	N2	22520	22520	90.8837921847247	0
132	V	1	20924180	N2	1	N2	61705	61705	113.016044080707	0
133	X	1	17718942	N2	1	N2	17395	17395	110.484679505605	0
134	MtDNA	1	13794	N2	1	N2	36	36	1981.33333333333	0
135	I	1	15072434	CB4856	2	CB4856	21342	21342	68.2735451222941	0
136	II	1	15279421	CB4856	2	CB4856	32910	32910	76.2178669097539	0
137	III	1	13783801	CB4856	2	CB4856	20103	20103	65.2343431328657	0
138	IV	1	17493829	CB4856	2	CB4856	22520	22520	64.9701598579041	0
139	V	1	20924180	CB4856	2	CB4856	61705	61705	74.683656105664	0
140	X	1	17718942	CB4856	2	CB4856	17395	17395	80.5093992526588	0
141	MtDNA	1	13794	CB4856	2	CB4856	36	36	1302.13888888889	0
142	I	1	15072434	N2	1	N2	24991	24991	5.29742707375	0
143	II	1	15279421	N2	1	N2	36363	36363	5.58790528834	0
144	III	1	13783801	N2	1	N2	23284	23284	5.41075416595	0
145	IV	1	17493829	N2	1	N2	26012	26012	5.72543441489	0
146	V	1	20924180	N2	1	N2	66609	66609	6.11324295516	0
147	X	1	17718942	N2	1	N2	19886	19886	7.78663381273	0
148	MtDNA	1	13794	N2	1	N2	35	35	111.542857143	0
149	I	1	15072434	CB4856	2	CB4856	24991	24991	63.5333520067	0
150	II	1	15279421	CB4856	2	CB4856	36363	36363	71.119544592	0
151	III	1	13783801	CB4856	2	CB4856	23284	23284	60.2973286377	0
152	IV	1	17493829	CB4856	2	CB4856	26012	26012	61.6390896509	0
153	V	1	20924180	CB4856	2	CB4856	66609	66609	70.8196039574	0
154	X	1	17718942	CB4856	2	CB4856	19886	19886	77.1858091119	0
155	MtDNA	1	13794	CB4856	2	CB4856	35	35	222.114285714	0
156	I	1	15072434	N2	1	N2	21342	21342	95.1838159498	0
157	II	1	15279421	N2	1	N2	32910	32910	111.991096931	0
158	III	1	13783801	N2	1	N2	20103	20103	92.5672287718	0
159	IV	1	17493829	N2	1	N2	22520	22520	90.8837921847	0
160	V	1	20924180	N2	1	N2	61705	61705	113.016044081	0
161	X	1	17718942	N2	1	N2	17395	17395	110.484679506	0
162	MtDNA	1	13794	N2	1	N2	36	36	1981.33333333	0
163	I	1	15072434	CB4856	2	CB4856	21342	21342	68.2735451223	0
164	II	1	15279421	CB4856	2	CB4856	32910	32910	76.2178669098	0
165	III	1	13783801	CB4856	2	CB4856	20103	20103	65.2343431329	0
166	IV	1	17493829	CB4856	2	CB4856	22520	22520	64.9701598579	0
167	V	1	20924180	CB4856	2	CB4856	61705	61705	74.6836561057	0
168	X	1	17718942	CB4856	2	CB4856	17395	17395	80.5093992527	0
169	MtDNA	1	13794	CB4856	2	CB4856	36	36	1302.13888889	0
170	I	1	15072434	ECA1059	1	N2	8902	8942	1.44798921591	78
171	II	1	15279421	ECA1059	1	N2	15328	15372	1.4814065762	66
172	III	1	13783801	ECA1059	1	N2	8208	8238	1.41946881092	38
173	IV	1	3952403	ECA1059	1	N2	2598	2604	1.40069284065	12
174	IV	3952404	3953176	ECA1059	2	CB4856	31	31	2	0
175	IV	3953177	17493829	ECA1059	1	N2	6705	6718	1.41506338553	26
176	V	1	13088873	ECA1059	2	CB4856	12328	12791	1.45181700195	656
177	V	13088874	20924180	ECA1059	1	N2	14681	14711	1.49921667461	44
178	X	1	17718942	ECA1059	1	N2	8262	8279	1.43149358509	34
179	MtDNA	1	13794	ECA1059	1	N2	36	36	1.5	0
180	I	1	15072434	ECA1065	1	N2	11750	11778	1.61812765957	50
181	II	1	2284296	ECA1065	1	N2	5641	5658	1.71122141464	26
182	II	2284297	2285383	ECA1065	2	CB4856	18	20	1.5	1
183	II	2285384	15279421	ECA1065	1	N2	14152	14177	1.63863764839	43
184	III	1	13783801	ECA1065	1	N2	10778	10799	1.62803859714	36
185	IV	1	3952891	ECA1065	1	N2	3617	3629	1.61570362179	20
186	IV	3952892	3953176	ECA1065	2	CB4856	26	26	1	0
187	IV	3953177	17493829	ECA1065	1	N2	9031	9059	1.60945631713	36
188	V	1	528346	ECA1065	2	CB4856	372	381	1.77150537634	15
189	V	528347	529870	ECA1065	1	N2	26	27	1.26923076923	1
190	V	529871	2721580	ECA1065	2	CB4856	4584	4754	1.63459860384	226
191	V	2721581	2721930	ECA1065	1	N2	18	18	1.61111111111	0
192	V	2721931	4446729	ECA1065	2	CB4856	4159	4293	1.57513825439	188
193	V	4446730	19303558	ECA1065	1	N2	22761	22868	1.7151706867	116
194	V	19303559	19307367	ECA1065	2	CB4856	38	46	2.5	3
195	V	19307368	19359709	ECA1065	1	N2	31	41	1.83870967742	8
196	V	19359710	20924180	ECA1065	2	CB4856	4021	4185	1.66177567769	258
197	X	1	17718942	ECA1065	1	N2	10429	10437	1.62287851184	16
198	MtDNA	1	13794	ECA1065	1	N2	36	36	1.5	0
199	I	1	15072434	N2	1	N2	21342	21342	95.1838159497704	0
200	II	1	15279421	N2	1	N2	32910	32910	111.991096931024	0
201	III	1	13783801	N2	1	N2	20103	20103	92.5672287718251	0
202	IV	1	17493829	N2	1	N2	22520	22520	90.8837921847247	0
203	V	1	20924180	N2	1	N2	61705	61705	113.016044080707	0
204	X	1	17718942	N2	1	N2	17395	17395	110.484679505605	0
205	MtDNA	1	13794	N2	1	N2	36	36	1981.33333333333	0
206	I	1	15072434	CB4856	2	CB4856	21342	21342	68.2735451222941	0
207	II	1	15279421	CB4856	2	CB4856	32910	32910	76.2178669097539	0
208	III	1	13783801	CB4856	2	CB4856	20103	20103	65.2343431328657	0
209	IV	1	17493829	CB4856	2	CB4856	22520	22520	64.9701598579041	0
210	V	1	20924180	CB4856	2	CB4856	61705	61705	74.683656105664	0
211	X	1	17718942	CB4856	2	CB4856	17395	17395	80.5093992526588	0
212	MtDNA	1	13794	CB4856	2	CB4856	36	36	1302.13888888889	0
213	I	1	15072434	N2	1	N2	24991	24991	5.29742707374655	0
214	II	1	15279421	N2	1	N2	36363	36363	5.58790528834255	0
215	III	1	13783801	N2	1	N2	23284	23284	5.41075416595087	0
216	IV	1	17493829	N2	1	N2	26012	26012	5.72543441488544	0
217	V	1	20924180	N2	1	N2	66609	66609	6.11324295515621	0
218	X	1	17718942	N2	1	N2	19886	19886	7.78663381273258	0
219	MtDNA	1	13794	N2	1	N2	35	35	111.542857142857	0
220	I	1	15072434	CB4856	2	CB4856	24991	24991	63.5333520067224	0
221	II	1	15279421	CB4856	2	CB4856	36363	36363	71.1195445920304	0
222	III	1	13783801	CB4856	2	CB4856	23284	23284	60.2973286376911	0
223	IV	1	17493829	CB4856	2	CB4856	26012	26012	61.6390896509303	0
224	V	1	20924180	CB4856	2	CB4856	66609	66609	70.8196039574232	0
225	X	1	17718942	CB4856	2	CB4856	19886	19886	77.185809111938	0
226	MtDNA	1	13794	CB4856	2	CB4856	35	35	222.114285714286	0
227	I	1	15072434	N2	1	N2	21342	21342	95.1838159498	0
228	II	1	15279421	N2	1	N2	32910	32910	111.991096931	0
229	III	1	13783801	N2	1	N2	20103	20103	92.5672287718	0
230	IV	1	17493829	N2	1	N2	22520	22520	90.8837921847	0
231	V	1	20924180	N2	1	N2	61705	61705	113.016044081	0
232	X	1	17718942	N2	1	N2	17395	17395	110.484679506	0
233	MtDNA	1	13794	N2	1	N2	36	36	1981.33333333	0
234	I	1	15072434	CB4856	2	CB4856	21342	21342	68.2735451223	0
235	II	1	15279421	CB4856	2	CB4856	32910	32910	76.2178669098	0
236	III	1	13783801	CB4856	2	CB4856	20103	20103	65.2343431329	0
237	IV	1	17493829	CB4856	2	CB4856	22520	22520	64.9701598579	0
238	V	1	20924180	CB4856	2	CB4856	61705	61705	74.6836561057	0
239	X	1	17718942	CB4856	2	CB4856	17395	17395	80.5093992527	0
240	MtDNA	1	13794	CB4856	2	CB4856	36	36	1302.13888889	0
241	I	1	15000000	CB4856	2	CB4856	2000	2000	1.3	2
242	II	1	15000000	CB4856	2	CB4856	2000	2000	1.3	2
243	III	1	13000000	CB4856	2	CB4856	2000	2000	1.3	2
244	IV	1	18000000	CB4856	2	CB4856	2000	2000	1.3	2
245	V	1	21000000	CB4856	2	CB4856	2000	2000	1.3	2
246	X	1	18000000	CB4856	2	CB4856	2000	2000	1.3	2
247	I	1	15000000	N2	1	N2	2000	2000	1.3	2
248	II	1	15000000	N2	1	N2	2000	2000	1.3	2
249	III	1	13000000	N2	1	N2	2000	2000	1.3	2
250	IV	1	18000000	N2	1	N2	2000	2000	1.3	2
251	V	1	21000000	N2	1	N2	2000	2000	1.3	2
252	X	1	18000000	N2	1	N2	2000	2000	1.3	2
